# Supplementary material for: Maternal Pre-Pregnancy Body Mass Index, Gestational Weight Gain and Children’s Cognitive Development: A Birth Cohort Study
Source: MDPI journal article supplement (doi:10.3390/nu14214613), 2022-11-02
Supplement: s1 [file s1]

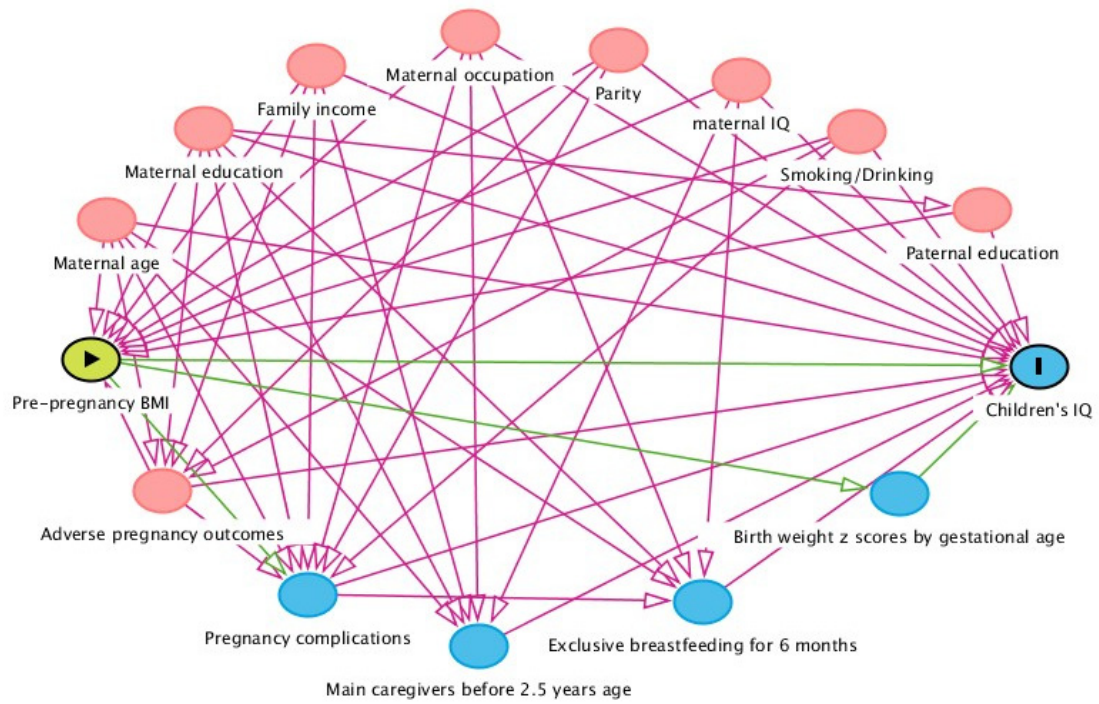

Figure S1. Directed acyclic graph to show the association between maternal pre-pregnancy BMI and children's cognitive development

**Table S1 Baseline characteristics of mother-child pairs included and excluded (*n* = 3273)**

| Characteristics                                                    | Participants included in the analysis( <i>n</i> = 1685) | Participants excluded from the analysis( <i>n</i> = 1588) | <i>P</i> values |
|--------------------------------------------------------------------|---------------------------------------------------------|-----------------------------------------------------------|-----------------|
| <b>Demographic characteristics</b>                                 |                                                         |                                                           |                 |
| Maternal educational level [ <i>n</i> (%)]                         |                                                         |                                                           | 0.55            |
| Junior high school or below                                        | 331(19.6)                                               | 329(20.7)                                                 |                 |
| Senior middle school                                               | 372(22.1)                                               | 363(22.9)                                                 |                 |
| Junior college or above                                            | 982(58.3)                                               | 896(56.4)                                                 |                 |
| Paternal educational level [ <i>n</i> (%)]                         |                                                         |                                                           | 0.17            |
| Junior high school or below                                        | 236(14.0)                                               | 248(15.6)                                                 |                 |
| Senior middle school                                               | 490(29.1)                                               | 421(26.5)                                                 |                 |
| Junior college or above                                            | 959(56.9)                                               | 919(57.9)                                                 |                 |
| Household monthly income per capita (yuan) [ <i>n</i> (%)]         |                                                         |                                                           | 0.003           |
| ≤2500                                                              | 481(28.5)                                               | 386(24.3)                                                 |                 |
| 2500~4000                                                          | 678(40.2)                                               | 724(45.6)                                                 |                 |
| >4000                                                              | 526(31.2)                                               | 478(30.1)                                                 |                 |
| <b>Maternal characteristics</b>                                    |                                                         |                                                           |                 |
| Age (years) [Mean(SD)]                                             | 26.6(3.5)                                               | 26.6(3.8)                                                 | 0.85            |
| IQ [Mean(SD)]                                                      | 96.3(10.7)                                              | 95.4(10.7)                                                | 0.02            |
| Occupation [ <i>n</i> (%)]                                         |                                                         |                                                           | 0.15            |
| No job                                                             | 684(40.6)                                               | 682(42.9)                                                 |                 |
| Mental job                                                         | 824(48.9)                                               | 767(48.3)                                                 |                 |
| Manual job                                                         | 177(10.5)                                               | 139(8.8)                                                  |                 |
| Parity [ <i>n</i> (%)]                                             |                                                         |                                                           | 0.66            |
| Nulliparous                                                        | 1521(90.3)                                              | 1426(89.8)                                                |                 |
| Multiparous                                                        | 164(9.7)                                                | 162(10.2)                                                 |                 |
| Previous adverse pregnancy outcomes [ <i>n</i> (%)]                |                                                         |                                                           | 0.15            |
| Didn't have                                                        | 1007(59.8)                                              | 910(57.3)                                                 |                 |
| Had                                                                | 678(40.2)                                               | 678(42.7)                                                 |                 |
| Pregnancy complications [ <i>n</i> (%)]                            |                                                         |                                                           | 0.52            |
| Didn't have                                                        | 1399(83.0)                                              | 1305(82.2)                                                |                 |
| Had                                                                | 286(17.0)                                               | 283(17.8)                                                 |                 |
| Smoking during pregnancy [ <i>n</i> (%)]                           |                                                         |                                                           | 0.48            |
| No                                                                 | 1616(95.9)                                              | 1515(95.4)                                                |                 |
| Yes                                                                | 69(4.1)                                                 | 73(4.6)                                                   |                 |
| Drinking during pregnancy [ <i>n</i> (%)]                          |                                                         |                                                           | 0.01            |
| No                                                                 | 1570(93.2)                                              | 1442(90.8)                                                |                 |
| Yes                                                                | 115(6.8)                                                | 146(9.2)                                                  |                 |
| <b>Children's characteristics</b>                                  |                                                         |                                                           |                 |
| Gestational age <sup>a</sup> (week) [Mean(SD)]                     | 39.1(1.4)                                               | 39.0(1.4)                                                 | 0.004           |
| Birth weight (g) <sup>a</sup> [Mean(SD)]                           | 3373.7(435.0)                                           | 3356.6(460.3)                                             | 0.28            |
| Children's sex <sup>a</sup> [ <i>n</i> (%)]                        |                                                         |                                                           | 0.06            |
| Boy                                                                | 888(52.7)                                               | 782(49.2)                                                 |                 |
| Girl                                                               | 797(47.3)                                               | 801(50.4)                                                 |                 |
| Exclusive breastfeeding for 6 months <sup>a</sup> [ <i>n</i> (%)]  |                                                         |                                                           | 0.07            |
| No                                                                 | 1490(88.4)                                              | 1366(84.1)                                                |                 |
| Yes                                                                | 154(9.1)                                                | 171(10.8)                                                 |                 |
| Main caregivers before 3 years of age <sup>a</sup> [ <i>n</i> (%)] |                                                         |                                                           | 0.02            |
| Parents                                                            | 854(50.7)                                               | 861(54.2)                                                 |                 |
| Grandparents                                                       | 820(48.7)                                               | 705(44.4)                                                 |                 |

<sup>a</sup> Missing data: 3 in gestational age, 8 in birth weight, 5 in children's sex, 122 in exclusive breastfeeding for 6 months, 33 in main caregivers before 3 years of age.

**Table S2 Sensitivity analyses of the association between different maternal pre-pregnancy BMI and dimensions of children's cognition under different GWG classifications [OR (95%CI)]**

| GWG classifications |         | Inadequate GWG |           |              | Adequate GWG |           |              | Excessive GWG |           |             |              |
|---------------------|---------|----------------|-----------|--------------|--------------|-----------|--------------|---------------|-----------|-------------|--------------|
| Pre-pregnancy BMI   |         | <18.5          | 18.5–24.9 | ≥25          | <18.5        | 18.5–24.9 | ≥25          | <18.5         | 18.5–24.9 | 25–29.9     | ≥30          |
| VCI                 | Model 3 | 0.81           | Ref       | 1.40         | 0.80         | Ref       | 2.16         | 1.76          | Ref       | 1.16        | 4.05         |
|                     |         | (0.07-9.89)    |           | (0.12-16.80) | (0.30-2.14)  |           | (0.58-8.04)  | (0.93-3.31)   |           | (0.55-2.44) | (1.60-10.26) |
|                     | Model 4 | 0.70           | Ref       | 1.53         | 0.82         | Ref       | 2.02         | 1.77          | Ref       | 1.07        | 3.74         |
|                     |         | (0.05-9.36)    |           | (0.12-20.23) | (0.30-2.22)  |           | (0.56-7.31)  | (0.94-3.33)   |           | (0.51-2.21) | (1.50-9.29)  |
|                     | Model 5 | 0.55           | Ref       | 1.60         | 0.81         | Ref       | 2.17         | 1.79          | Ref       | 1.06        | 3.85         |
|                     |         | (0.04-6.80)    |           | (0.12-20.75) | (0.30-2.16)  |           | (0.61-7.73)  | (0.95-3.38)   |           | (0.51-2.20) | (1.55-9.54)  |
| VSI                 | Model 6 | 0.81           | Ref       | 2.08         | 0.82         | Ref       | 2.14         | 1.69          | Ref       | 1.20        | 4.21         |
|                     |         | (0.05-12.51)   |           | (0.15-28.23) | (0.31-2.21)  |           | (0.57-7.99)  | (0.88-3.27)   |           | (0.58-2.48) | (1.68-10.56) |
|                     | Model 3 | 2.29           | Ref       | 2.77         | 0.21         | Ref       | 1.79         | 1.27          | Ref       | 1.17        | 1.08         |
|                     |         | (0.63-8.24)    |           | (0.21-36.47) | (0.05-0.88)  |           | (0.39-8.28)  | (0.73-2.20)   |           | (0.67-2.04) | (0.33-3.51)  |
|                     | Model 4 | 2.39           | Ref       | 2.34         | 0.21         | Ref       | 1.46         | 1.24          | Ref       | 1.21        | 1.12         |
|                     |         | (0.63-9.02)    |           | (0.19-29.23) | (0.05-0.89)  |           | (0.33-6.42)  | (0.71-2.16)   |           | (0.70-2.07) | (0.34-3.63)  |
| FRI                 | Model 5 | 2.15           | Ref       | 2.05         | 0.22         | Ref       | 1.60         | 1.26          | Ref       | 1.17        | 1.10         |
|                     |         | (0.59-7.83)    |           | (0.16-27.19) | (0.05-0.92)  |           | (0.36-7.07)  | (0.73-2.18)   |           | (0.68-2.01) | (0.34-3.56)  |
|                     | Model 6 | 2.30           | Ref       | 2.51         | 0.21         | Ref       | 1.30         | 1.28          | Ref       | 1.15        | 1.07         |
|                     |         | (0.61-8.60)    |           | (0.18-34.23) | (0.05-0.90)  |           | (0.29-5.83)  | (0.74-2.22)   |           | (0.67-1.99) | (0.33-3.50)  |
|                     | Model 3 | -              | Ref       | 1.29         | 0.90         | Ref       | 0.97         | 1.33          | Ref       | 0.97        | 0.38         |
|                     |         | (0.12-13.67)   |           | (0.43-1.92)  | (0.21-4.45)  |           | (0.68-2.60)  | (0.46-2.07)   |           | (0.05-2.86) |              |
| WMI                 | Model 4 | -              | Ref       | 1.30         | 0.78         | Ref       | 1.18         | 1.35          | Ref       | 0.87        | 0.37         |
|                     |         | (0.13-12.98)   |           | (0.37-1.66)  | (0.27-5.21)  |           | (0.69-2.64)  | (0.42-1.82)   |           | (0.05-2.71) |              |
|                     | Model 5 | -              | Ref       | 1.07         | 0.89         | Ref       | 1.59         | 1.35          | Ref       | 0.88        | 0.36         |
|                     |         | (0.09-12.27)   |           | (0.42-1.88)  | (0.35-7.15)  |           | (0.69-2.65)  | (0.42-1.84)   |           | (0.05-2.67) |              |
|                     | Model 6 | -              | Ref       | 1.47         | 0.89         | Ref       | 1.27         | 1.27          | Ref       | 0.88        | 0.37         |
|                     |         | (0.14-16.06)   |           | (0.42-1.89)  | (0.28-5.74)  |           | (0.63-2.56)  | (0.42-1.85)   |           | (0.05-2.75) |              |
| PSI                 | Model 3 | 1.69           | Ref       | 1.30         | 0.82         | Ref       | 0.55         | 1.62          | Ref       | 1.72        | 1.20         |
|                     |         | (0.27-10.46)   |           | (0.12-14.81) | (0.39-1.74)  |           | (0.07-4.22)  | (0.91-2.87)   |           | (0.94-3.17) | (0.29-5.02)  |
|                     | Model 4 | 1.63           | Ref       | 1.51         | 0.82         | Ref       | 0.51         | 1.60          | Ref       | 1.55        | 1.11         |
|                     |         | (0.25-10.51)   |           | (0.14-16.71) | (0.38-1.76)  |           | (0.07-3.81)  | (0.90-2.86)   |           | (0.85-2.83) | (0.27-4.61)  |
|                     | Model 5 | 1.89           | Ref       | 1.50         | 0.83         | Ref       | 0.52         | 1.59          | Ref       | 1.53        | 1.09         |
|                     |         | (0.30-11.84)   |           | (0.14-16.43) | (0.39-1.76)  |           | (0.07-3.84)  | (0.89-2.83)   |           | (0.84-2.78) | (0.26-4.56)  |
| FSIQ                | Model 6 | 2.23           | Ref       | 1.71         | 0.89         | Ref       | 0.53         | 1.63          | Ref       | 1.44        | 1.03         |
|                     |         | (0.31-15.88)   |           | (0.15-19.24) | (0.42-1.89)  |           | (0.07-4.02)  | (0.92-2.90)   |           | (0.79-2.62) | (0.25-4.30)  |
|                     | Model 3 | 1.96           | Ref       | -            | 0.83         | Ref       | 1.50         | 1.17          | Ref       | 1.88        | 1.28         |
|                     |         | (0.55-7.03)    |           | (0.42-1.64)  | (0.33-6.90)  |           | (0.64-2.14)  | (1.11-3.18)   |           | (0.39-4.17) |              |
|                     | Model 4 | 2.25           | Ref       | -            | 0.88         | Ref       | 1.52         | 1.18          | Ref       | 1.73        | 1.21         |
|                     |         | (0.55-9.20)    |           | (0.44-1.74)  | (0.35-6.73)  |           | (0.65-2.16)  | (1.03-2.88)   |           | (0.37-3.93) |              |
| FSIQ                | Model 5 | 1.93           | Ref       | -            | 0.84         | Ref       | 1.69         | 1.19          | Ref       | 1.70        | 1.20         |
|                     |         | (0.51-7.36)    |           | (0.43-1.64)  | (0.38-7.46)  |           | (0.65-2.18)  | (1.02-2.83)   |           | (0.37-3.87) |              |
|                     | Model 6 | 1.95           | Ref       | -            | 0.79         | Ref       | 1.44         | 1.21          | Ref       | 1.68        | 1.15         |
|                     |         | (0.55-6.92)    |           | (0.40-1.59)  | (0.32-6.42)  |           | (0.66-2.22)  | (1.00-2.81)   |           | (0.35-3.76) |              |
|                     | Model 3 | 1.56           | Ref       | 1.35         | 0.57         | Ref       | 3.02         | 2.49          | Ref       | 1.63        | 3.15         |
|                     |         | (0.23-10.58)   |           | (0.11-16.94) | (0.19-1.67)  |           | (0.63-14.58) | (1.32-4.70)   |           | (0.78-3.44) | (1.05-9.44)  |
| FSIQ                | Model 4 | 1.71           | Ref       | 1.28         | 0.59         | Ref       | 2.31         | 2.53          | Ref       | 1.39        | 2.80         |
|                     |         | (0.20-14.90)   |           | (0.08-19.78) | (0.20-1.75)  |           | (0.52-10.31) | (1.34-4.78)   |           | (0.67-2.88) | (0.95-8.24)  |
|                     | Model 5 | 1.09           | Ref       | 2.11         | 0.62         | Ref       | 2.31         | 2.50          | Ref       | 1.40        | 2.90         |
|                     |         | (0.15-7.72)    |           | (0.15-30.74) | (0.21-1.83)  |           | (0.51-10.41) | (1.33-4.72)   |           | (0.68-2.91) | (0.99-8.51)  |
| FSIQ                | Model 6 | 2.10           | Ref       | 2.44         | 0.48         | Ref       | 2.81         | 2.34          | Ref       | 1.43        | 2.92         |
|                     |         | (0.28-15.95)   |           | (0.14-41.28) | (0.14-1.63)  |           | (0.60-13.13) | (1.22-4.50)   |           | (0.69-2.95) | (0.99-8.64)  |

Abbreviations: GWG: gestational weight gain, VCI: verbal comprehension index, VSI: visual space index, FRI: fluid reasoning index, WMI: working memory index, PSI: processing speed index, FSIQ: full scale intelligence quotient.

The cognitive level of average or above IQ was used as the reference group.

“-”: no results due to the limited cases. “Ref”: reference.

Model 3: Further adjusted for maternal pregnancy complications; Model 4: Further adjusted for birth weight Z scores by gestational age; Model 5: Further adjusted for children’s sex; Model 6: Further adjusted for exclusive breastfeeding for 6 months and the main caregivers before 3 years of age.
